# Supplementary material
Source: Springer Nature journal article supplement (https://www.springermedizin.de/resource/supplementary/12931_2013_1483_MOESM1_ESM.pdf/9426284)

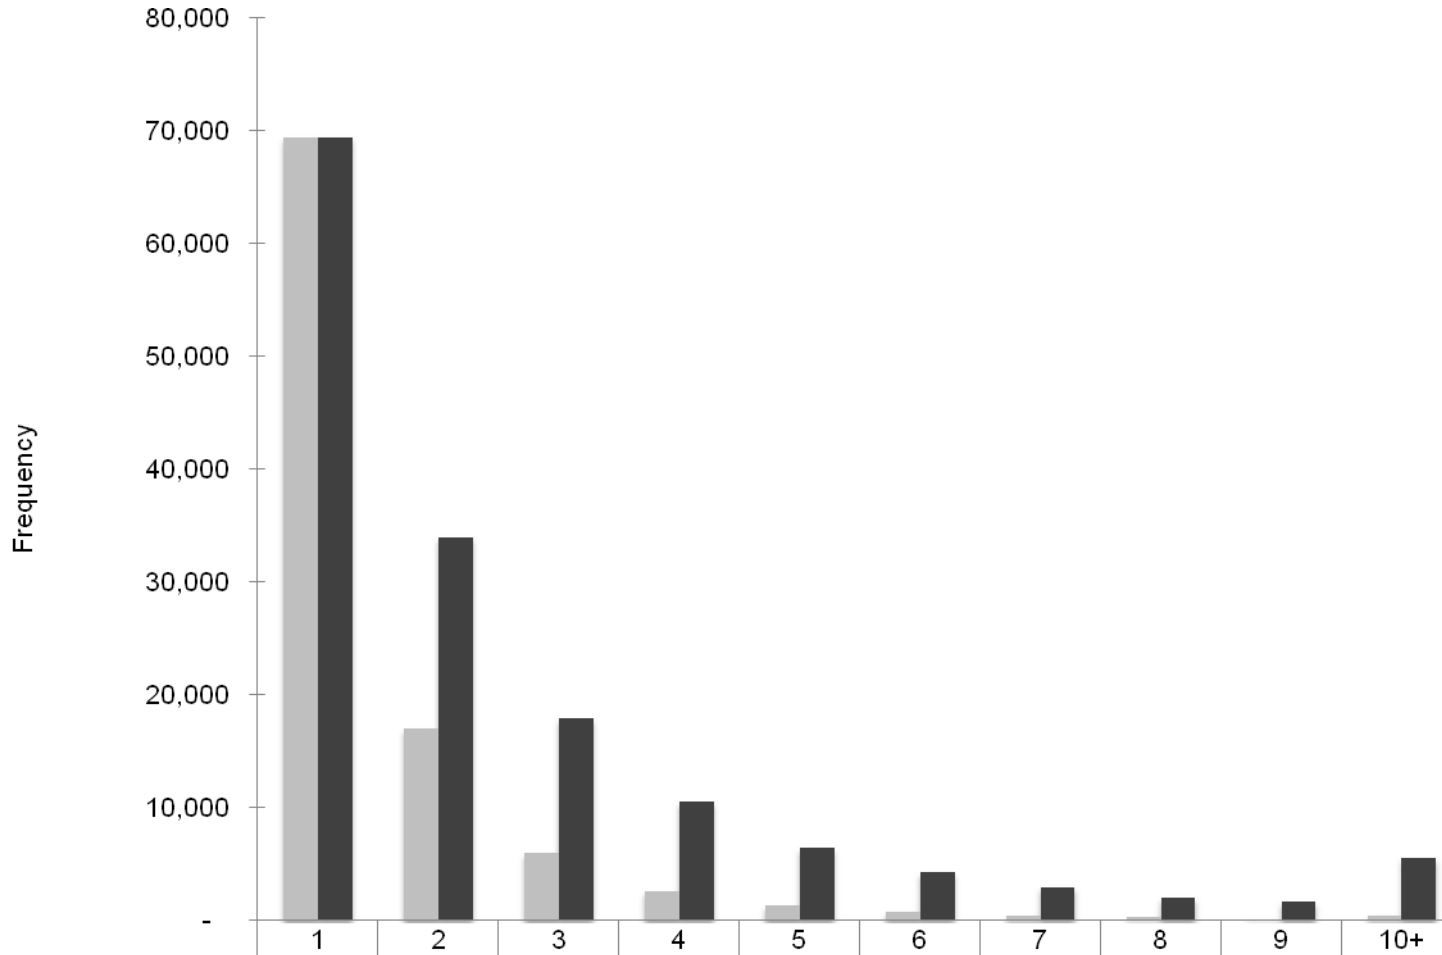

|                          | 1      | 2      | 3      | 4      | 5     | 6     | 7     | 8     | 9     | 10+   |
|--------------------------|--------|--------|--------|--------|-------|-------|-------|-------|-------|-------|
| Number of COPD patients  | 69,465 | 17,005 | 5,974  | 2,629  | 1,287 | 713   | 422   | 254   | 183   | 415   |
| Number of COPD ED visits | 69,465 | 34,010 | 17,922 | 10,516 | 6,435 | 4,278 | 2,954 | 2,032 | 1,647 | 5,544 |

ED Visit Frequency

Supplement: MOESM1 [file 9426284]
